# Supplementary material
Source: publisher figshare collection journal article supplement (https://diabetesjournals.figshare.com/articles/dataset/_/19747645)
Supplement: Supplementary file 1 [file 1]

**Supplemental Table 1 – Association of year-1 Substrates With CV Outcomes\***

|              | <b>HF</b>                            | <b>CV death</b>         | <b>HF or CV death</b>   | <b>All deaths</b>       | <b>Non-fatal MI</b>     |
|--------------|--------------------------------------|-------------------------|-------------------------|-------------------------|-------------------------|
| Tx alone     | 0.85 [0.68–1.05]                     | 0.90 [0.70–1.16]        | 0.85 [0.68–1.05]        | 0.88 [0.72–1.08]        | 0.88 [0.66–1.17]        |
| Glucose      | <b>2.07 [1.02–4.18]</b>              | 0.90 [0.52–1.54]        | 1.18 [0.75–1.85]        | 1.01 [0.65–0.58]        | <b>1.76 [1.01–3.06]</b> |
| FFA          | <b>0.40 [0.22–0.73]</b>              | <b>0.42 [0.27–0.67]</b> | <b>0.44 [0.30–0.64]</b> | <b>0.42 [0.29–0.61]</b> | 1.04 [0.63–1.74]        |
| Glycerol     | <b>2.24 [1.36–3.68]</b>              | <b>2.20 [1.51–3.20]</b> | <b>2.12 [1.54–2.90]</b> | <b>1.88 [1.38–2.56]</b> | 0.93 [0.64–1.37]        |
| βOH          | 1.01 [0.67–1.56]                     | 1.08 [0.79–1.49]        | 1.06 [0.81–1.39]        | <b>1.37 [1.06–1.78]</b> | 0.95 [0.69–1.31]        |
| AcAc         | 1.55 [0.92–2.64]                     | <b>1.49 [1.08–2.23]</b> | <b>1.51 [1.08–2.12]</b> | 1.12 [0.82–1.54]        | 1.17 [0.79–1.75]        |
| Lactate      | 1.05 [0.54–2.06]                     | 1.20 [0.73–1.98]        | 1.13 [0.74–1.73]        | 0.97 [0.66–1.44]        | 0.70 [0.43–1.16]        |
| Pyruvate     | 1.09 [0.50–2.48]                     | 0.94 [0.53–1.73]        | 1.11 [0.67–1.86]        | 0.82 [0.53–1.32]        | <b>2.23 [1.18–4.23]</b> |
| Glucose-adj  | 1.46 [0.70–3.01]                     | 0.64 [0.37–1.12]        | 0.84 [0.53–1.33]        | 0.76 [0.48–1.21]        | 1.66 [0.91–3.03]        |
| FFA-adj      | 0.60 [0.30–1.21]                     | <b>0.60 [0.37–0.99]</b> | <b>0.63 [0.41–0.97]</b> | <b>0.55 [0.37–0.82]</b> | 1.22 [0.71–2.12]        |
| Glycerol-adj | <b>1.78 [0.98– 3.26]<sup>†</sup></b> | <b>2.00 [1.30–3.10]</b> | <b>1.83 [1.30–2.65]</b> | <b>1.73 [1.21–2.47]</b> | 0.99 [0.64–1.54]        |
| βOH-adj      | 1.08 [0.69–1.72]                     | 1.00 [0.72–1.41]        | 1.03 [0.78–1.38]        | 1.28 [0.97–1.68]        | 0.99 [0.72–1.37]        |
| AcAc-adj     | 1.11 [0.65–1.93]                     | 1.36 [0.90–2.07]        | 1.30 [0.91–1.84]        | 1.09 [0.79–1.52]        | 1.03 [0.69–1.55]        |
| Lactate-adj  | 0.86 [0.42–1.75]                     | 1.02 [0.61–1.72]        | 0.95 [0.61–1.49]        | 0.87 [0.58–1.32]        | 0.61 [0.36–1.04]        |
| Pyruvate-adj | 1.64 [0.73–3.90]                     | 1.28 [0.71–2.40]        | 1.52 [0.91–2.60]        | 1.09 [0.68–1.78]        | <b>2.81 [1.46–5.46]</b> |
| Tx-adj       | 0.84 [0.55–1.30]                     | 0.97 [0.70–1.36]        | 0.89 [0.68–1.18]        | 0.86 [0.66–1.13]        | 1.01 [0.72–1.44]        |

\*Entries are risk ratios and 95% confidence intervals (per 1 log unit of the predictor). Statistically significant HR's are highlighted in bold. <sup>†</sup>*p*=0.06. CV, cardiovascular; HF, heart failure; MI, myocardial infarction; Tx, canagliflozin treatment, combined doses; FFA, free fatty acids; β OH, β -hydroxybutyrate; AcAc, acetoacetate; adj, adjusted for sex; age; body mass index; estimated glomerular filtration rate; HbA<sub>1c</sub>; systolic blood pressure; prior CV disease; prior HF; smoking; urinary albumin-to-creatinine ratio; high-density lipoprotein; low-density lipoprotein; and use of statins, renin-angiotensin-aldosterone-system inhibitors, antithrombotics, and loop diuretics in addition to all 7 log-transformed metabolites.
